# Supplementary material for: Cation–π interaction in cofacial molecular dyads: a DFT and TDDFT study
Source: Royal Society of Chemistry journal article supplement (doi:10.1039/c6ra10368e), 2016-01-01
Supplement: c6ra10368e1.pdf [file c6ra10368e1.pdf]

## Supporting Information

### Cation- $\pi$ Interaction in Cofacial Molecular Dyads: A DFT and TDDFT Study

Sanjeev Pran Mahanta,<sup>a\*</sup> Biswajyoti Dutta,<sup>b</sup> Pradip K. Bhattacharyaa<sup>b\*</sup> and Kusum K.

Bania<sup>a\*</sup>

<sup>a</sup>Department of Chemical Sciences, Tezpur University, Napaam, Assam India, 784028

<sup>b</sup>Department of Chemistry, Arya Vidyapeeth College, Guwahati, Assam, India, 781016

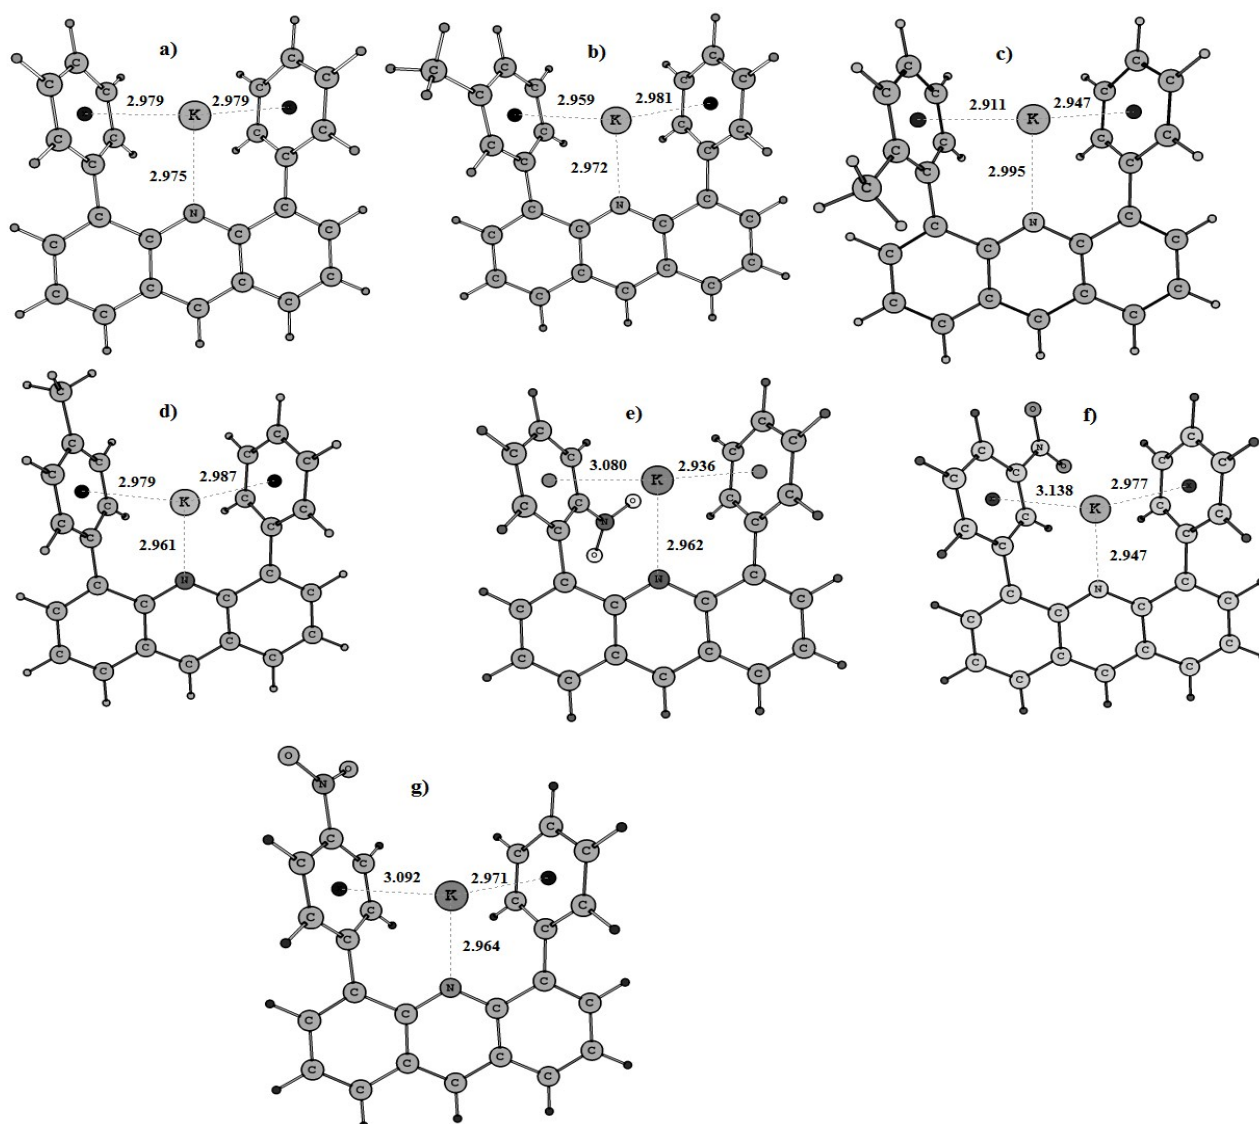

**Figure S1.** Cation- $\pi$  complexes of  $K^+$  with  $-CH_3$  and  $-NO_2$  group substituted at different position of the phenyl ring. (b-d) are  $-CH_3$  substituted  $K^+@BPA$  complexes, (e-g) are  $-NO_2$  substituted  $K^+@BPA$  complexes.

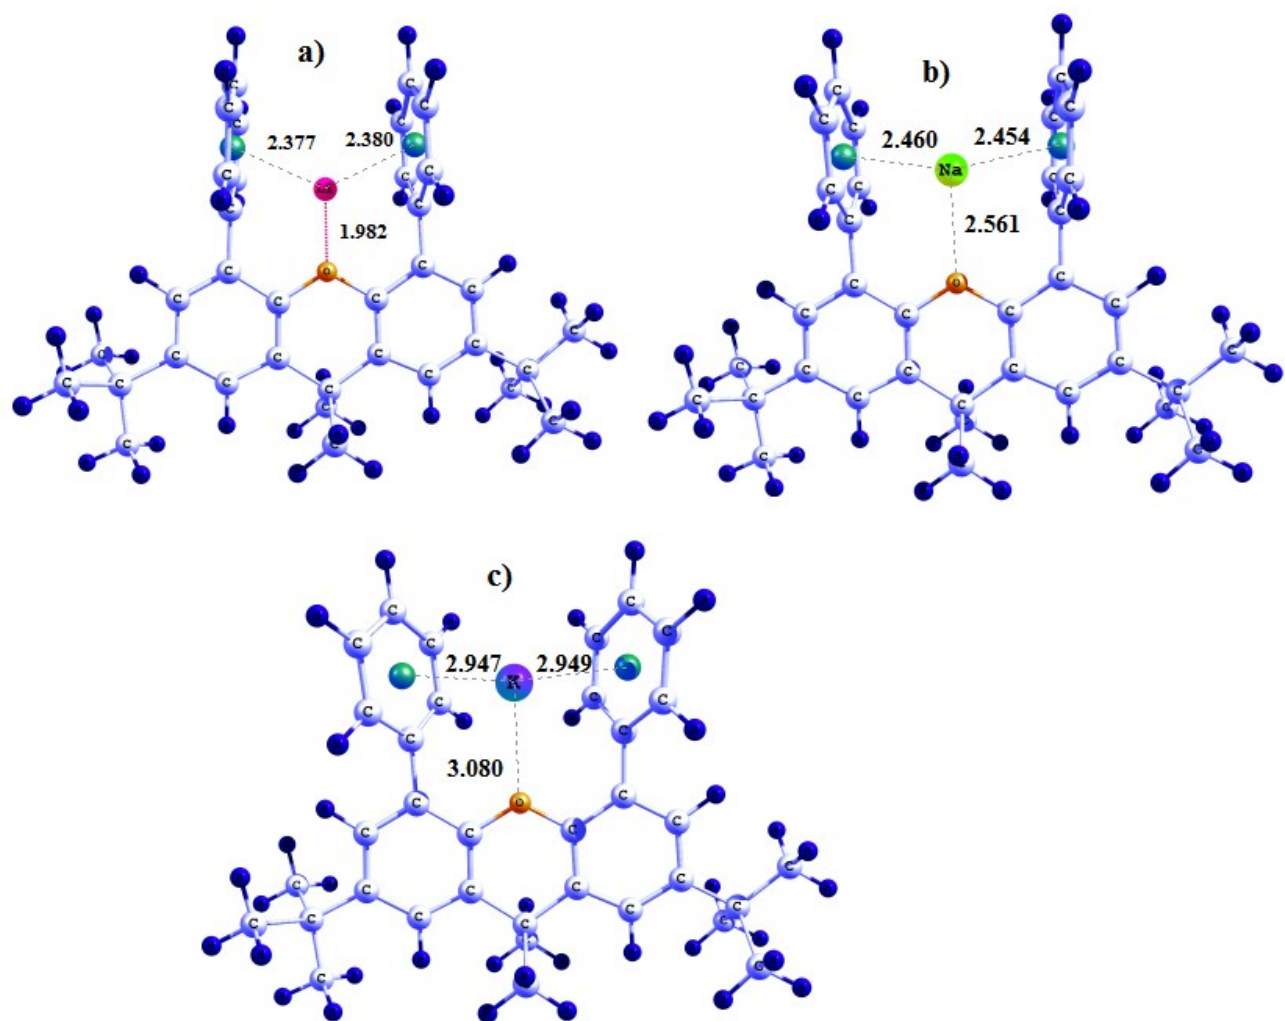

**Figure S2.** Cation- $\pi$  complex of a) Li<sup>+</sup> b) Na<sup>+</sup> and c) K<sup>+</sup> with the reported molecular dyad.

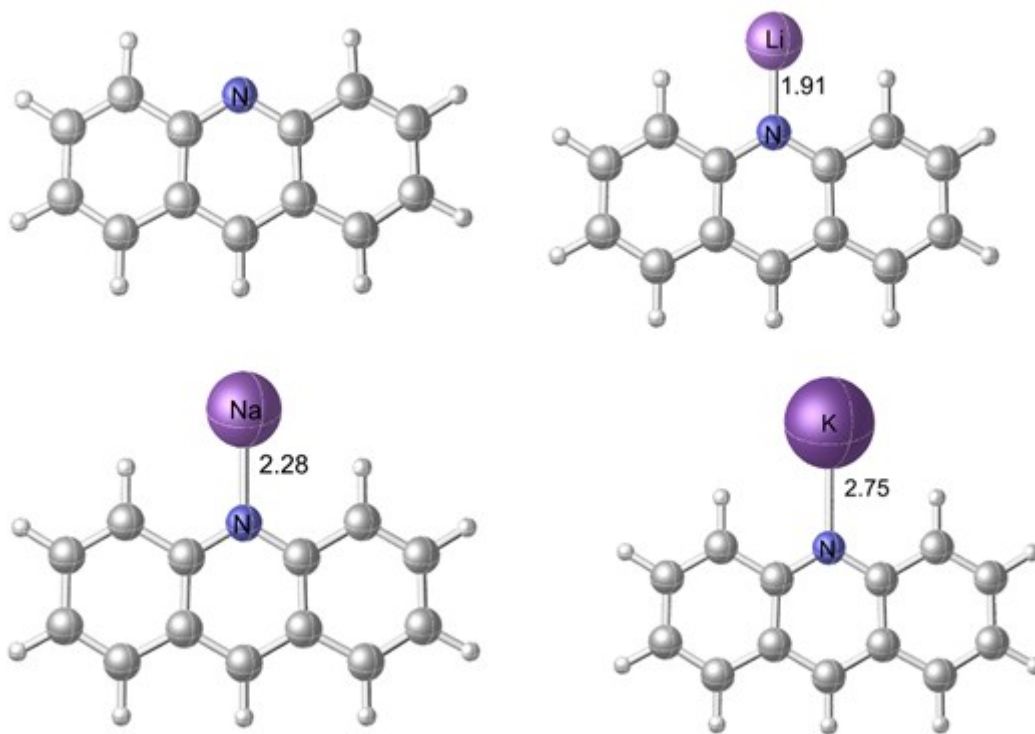

**Figure S3.** Optimized geometries of acridine moiety and the co-ordinated compounds of acridine with cations (Li<sup>+</sup>, Na<sup>+</sup>, K<sup>+</sup>)



**Table S1.** Interaction energy (in kcal/mol) of the cation- $\pi$  complexes in gas phase and in various solvents using B3LYP/6-31+G (d,p)

| Sl.No. | Complex                                 | Gas Phase | CCl <sub>4</sub><br>( $\epsilon=2.23$ ) | Chloroform<br>( $\epsilon=4.71$ ) | DCM<br>( $\epsilon=8.93$ ) | Acetone<br>( $\epsilon=20.49$ ) | Ethanol<br>( $\epsilon=24.85$ ) | Methanol<br>( $\epsilon=32.61$ ) | DMSO<br>( $\epsilon=46.83$ ) | Water<br>( $\epsilon=78.36$ ) |
|--------|-----------------------------------------|-----------|-----------------------------------------|-----------------------------------|----------------------------|---------------------------------|---------------------------------|----------------------------------|------------------------------|-------------------------------|
| 1      | Li <sup>+</sup> @BPA                    | -79.53    | -31.19                                  | -5.01                             | -0.79                      | 1.34                            | 2.21                            | 3.92                             | 4.49                         | 4.96                          |
| 2      | m-CH <sub>3</sub> -Li <sup>+</sup> @BPA | -79.51    | -30.97                                  | -10.52                            | -2.14                      | 2.91                            | 1.48                            | 4.30                             | 4.99                         | 5.63                          |
| 3      | o-CH <sub>3</sub> -Li <sup>+</sup> @BPA | -80.84    | -32.22                                  | -11.79                            | -3.48                      | 1.45                            | 1.13                            | 2.79                             | 3.46                         | 4.06                          |
| 4      | p-CH <sub>3</sub> -Li <sup>+</sup> @BPA | -80.87    | -32.45                                  | -12.15                            | -3.91                      | 1.00                            | 1.68                            | 2.33                             | 3.00                         | 3.60                          |
| 5      | m-NO <sub>2</sub> -Li <sup>+</sup> @BPA | -72.04    | -24.74                                  | -5.41                             | 2.22                       | 6.63                            | 4.24                            | 7.81                             | 8.40                         | 8.92                          |
| 6      | o-NO <sub>2</sub> -Li <sup>+</sup> @BPA | -88.31    | -31.47                                  | -10.73                            | -2.16                      | 3.08                            | 1.80                            | 4.54                             | 5.28                         | 5.96                          |
| 7      | p-NO <sub>2</sub> -Li <sup>+</sup> @BPA | -70.64    | -24.19                                  | -5.44                             | 1.84                       | 5.96                            | 6.56                            | 7.05                             | 7.58                         | 8.05                          |
| 8      | Na <sup>+</sup> @BPA                    | -59.06    | -23.00                                  | -7.99                             | -1.92                      | 1.73                            | 2.21                            | 2.74                             | 3.25                         | 3.71                          |
| 9      | m-CH <sub>3</sub> -Na <sup>+</sup> @BPA | -60.15    | -23.90                                  | -8.83                             | -2.71                      | 1.00                            | 1.48                            | 2.02                             | 2.55                         | 3.02                          |
| 10     | o-CH <sub>3</sub> -Na <sup>+</sup> @BPA | -60.54    | -24.29                                  | -9.22                             | -3.09                      | 0.63                            | 1.13                            | 1.67                             | 2.20                         | 2.69                          |
| 11     | p-CH <sub>3</sub> -Na <sup>+</sup> @BPA | -60.26    | -23.94                                  | -8.76                             | -2.56                      | 1.19                            | 1.68                            | 2.23                             | 2.76                         | 3.24                          |
| 12     | m-NO <sub>2</sub> -Na <sup>+</sup> @BPA | -50.66    | -17.27                                  | -4.09                             | 0.98                       | 3.87                            | 4.24                            | 4.64                             | 5.02                         | 5.37                          |
| 13     | o-NO <sub>2</sub> -Na <sup>+</sup> @BPA | -65.77    | -22.57                                  | -8.03                             | -2.16                      | 1.34                            | 1.80                            | 2.30                             | 2.79                         | 3.23                          |
| 14     | p-NO <sub>2</sub> -Na <sup>+</sup> @BPA | -49.54    | -15.51                                  | -2.01                             | 3.19                       | 6.18                            | 6.56                            | 6.98                             | 7.38                         | 7.74                          |
| 15     | K <sup>+</sup> @BPA                     | -39.77    | -16.93                                  | -7.56                             | -3.75                      | -1.44                           | -1.14                           | -0.80                            | -0.47                        | -0.17                         |
| 16     | m-CH <sub>3</sub> -K <sup>+</sup> @BPA  | -40.59    | -17.53                                  | -8.05                             | -4.18                      | -1.81                           | -1.50                           | -1.15                            | -0.81                        | -0.49                         |
| 17     | o-CH <sub>3</sub> -K <sup>+</sup> @BPA  | -39.87    | -16.54                                  | -6.95                             | -3.04                      | -0.62                           | -0.29                           | 0.07                             | 0.43                         | 0.75                          |
| 18     | p-CH <sub>3</sub> -K <sup>+</sup> @BPA  | -40.70    | -17.53                                  | -8.01                             | -4.12                      | -1.76                           | -1.44                           | -1.09                            | -0.75                        | -0.44                         |
| 19     | m-NO <sub>2</sub> -K <sup>+</sup> @BPA  | -33.26    | -11.85                                  | -3.54                             | -0.35                      | 1.49                            | 1.73                            | 1.99                             | 2.24                         | 2.46                          |
| 20     | o-NO <sub>2</sub> -K <sup>+</sup> @BPA  | -43.23    | -12.99                                  | -4.08                             | -0.61                      | 1.41                            | 1.68                            | 1.96                             | 2.24                         | 2.49                          |
| 21     | p-NO <sub>2</sub> -K <sup>+</sup> @BPA  | -31.73    | -10.97                                  | -3.11                             | -0.18                      | 1.46                            | 1.67                            | 1.89                             | 2.10                         | 2.29                          |

**Table S2- TDDFT analysis in Gas Phase and in different solvent systems**

| <b>In gas phase</b>                     |                  |        |               |                      |
|-----------------------------------------|------------------|--------|---------------|----------------------|
| Complex                                 | $\lambda_{\max}$ | $f$    | FMO           | orbital contribution |
| BPA                                     | 363.59           | 0.1867 | HOMO→LUMO     | 0.69483              |
|                                         | 253.47           | 0.3735 | HOMO→LUMO+1   | 0.50656              |
|                                         | 235.88           | 0.9821 | HOMO→LUMO+2   | 0.54470              |
| m-CH <sub>3</sub> -@BPA                 | 363.19           | 0.1862 | HOMO→LUMO     | 0.69480              |
|                                         | 253.34           | 0.339  | HOMO→LUMO+1   | 0.48064              |
|                                         | 236.09           | 0.525  | HOMO→LUMO+2   | 0.41793              |
| o-CH <sub>3</sub> -@BPA                 | 358.99           | 0.1681 | HOMO→LUMO     | 0.69434              |
|                                         | 247.95           | 0.5352 | HOMO→LUMO+2   | 0.44104              |
|                                         |                  |        | HOMO→LUMO+1   | 0.38789              |
|                                         | 235.76           | 0.7171 | HOMO→LUMO+2   | 0.45284              |
| HOMO→LUMO+1                             |                  |        | 0.38789       |                      |
| p-CH <sub>3</sub> -@BPA                 | 365              | 0.1967 | HOMO→LUMO     | 0.69342              |
|                                         | 254.07           | 0.2861 | HOMO→LUMO+1   | 0.40933              |
|                                         | 236.42           | 0.9168 | HOMO→LUMO+2   | 0.52578              |
| m-NO <sub>2</sub> -@BPA                 | 358.96           | 0.1828 | HOMO→LUMO     | 0.67698              |
|                                         | 253.22           | 0.2754 | HOMO→LUMO+2   | 0.55065              |
| o-NO <sub>2</sub> -@BPA                 | 358.96           | 0.1461 | HOMO→LUMO     | 0.58842              |
|                                         | 308.17           | 0.0581 | HOMO-3→LUMO+1 | 0.30371              |
|                                         | 269.69           | 0.0322 | HOMO-1→LUMO+1 | 0.36966              |
| p-NO <sub>2</sub> -@BPA                 | 363.95           | 0.2233 | HOMO→LUMO     | 0.63735              |
|                                         | 302.01           | 0.11   | HOMO→LUMO+1   | 0.50748              |
|                                         | 257.76           | 0.2389 | HOMO-1→LUMO+1 | 0.48816              |
| Li <sup>+</sup> @BPA                    | 357.17           | 0.1211 | HOMO→LUMO     | 0.69661              |
|                                         | 247.39           | 0.3038 | HOMO→LUMO+1   | 0.53330              |
|                                         |                  |        |               | 0.35982              |
|                                         | 235.89           | 0.522  | HOMO→LUMO+2   | 0.32347              |
|                                         |                  |        |               |                      |
| m-CH <sub>3</sub> -Li <sup>+</sup> @BPA | 357.48           | 0.1235 | HOMO→LUMO     | 0.6973               |
|                                         | 236.25           | 0.4225 | HOMO→LUMO+1   | 0.4043               |
|                                         |                  |        |               |                      |
|                                         | 235.31           | 0.4794 | HOMO→LUMO+3   | 0.45792              |
| o-CH <sub>3</sub> -Li <sup>+</sup> @BPA | 354.34           | 0.117  | HOMO→LUMO     | 0.69727              |
|                                         | 306.49           | 0.0905 | HOMO-1→LUMO+1 | 0.59186              |
|                                         | 235.66           | 0.667  | HOMO→LUMO+2   | 0.4445               |
| HOMO→LUMO+1                             |                  |        | 0.33813       |                      |

|                                         |        |        |               |         |
|-----------------------------------------|--------|--------|---------------|---------|
| p-CH <sub>3</sub> -Li <sup>+</sup> @BPA | 354.73 | 0.1230 | HOMO→LUMO     | 0.69696 |
|                                         | 241    | 0.4664 | HOMO→LUMO+1   | 0.44511 |
|                                         | 231.89 | 0.4204 | HOMO→LUMO+3   | 0.47462 |
| m-NO <sub>2</sub> -Li <sup>+</sup> @BPA | 356.84 | 0.1299 | HOMO→LUMO     | 0.66979 |
|                                         | 257.74 | 0.1796 | HOMO→LUMO+2   | 0.61491 |
|                                         | 238.54 | 0.2878 | HOMO-6→LUMO+1 | 0.36004 |
| o-NO <sub>2</sub> -Li <sup>+</sup> @BPA | 355.24 | 0.1188 | HOMO→LUMO+1   | 0.67847 |
|                                         | 306.54 | 0.0998 | HOMO-1→LUMO+1 | 0.57916 |
|                                         | 266.27 | 0.0228 | HOMO-5→LUMO   | 0.37753 |
| p-NO <sub>2</sub> -Li <sup>+</sup> @BPA | 356.01 | 0.1371 | HOMO→LUMO     | 0.67417 |
|                                         | 306.51 | 0.0933 | HOMO-1→LUMO   | 0.56666 |
|                                         | 238.47 | 0.7961 | HOMO→LUMO+3   | 0.4059  |
| Na <sup>+</sup> @BPA                    | 349.84 | 0.1184 | HOMO→LUMO     | 0.69668 |
|                                         | 237.16 | 1.2756 | HOMO→LUMO+2   | 0.57457 |
|                                         |        |        |               |         |
| m-CH <sub>3</sub> -Na <sup>+</sup> @BPA | 349.98 | 0.1202 | HOMO→LUMO     | 0.69667 |
|                                         | 305.87 | 0.0783 | HOMO-1→LUMO   | 0.58193 |
|                                         | 237.42 | 1.1901 | HOMO→LUMO+1   | 0.49529 |
| o-CH <sub>3</sub> -Na <sup>+</sup> @BPA | 350.68 | 0.118  | HOMO→LUMO     | 0.69677 |
|                                         |        |        | HOMO→LUMO+1   | 0.44215 |
|                                         | 238.54 | 0.5005 | HOMO→LUMO+2   | 0.4269  |
|                                         | 237.25 | 0.6207 | HOMO→LUMO+2   | 0.45102 |
| p-CH <sub>3</sub> -Na <sup>+</sup> @BPA | 349.9  | 0.1219 | HOMO→LUMO     | 0.6967  |
|                                         |        |        |               |         |
|                                         | 305.89 | 0.0787 | HOMO-1→LUMO   | 0.58311 |
|                                         |        |        | HOMO→LUMO+1   | 0.47789 |
|                                         | 237.34 | 1.2767 | HOMO-1→LUMO   | 0.34783 |
|                                         |        |        | HOMO→LUMO+1   | 0.54688 |
| m-NO <sub>2</sub> -Na <sup>+</sup> @BPA | 354.86 | 0.1368 | HOMO→LUMO     | 0.42937 |
|                                         |        |        | HOMO→LUMO+2   |         |
|                                         | 256.7  | 0.1184 |               | 0.58734 |
|                                         |        |        | HOMO→LUMO+3   | 0.3813  |
|                                         | 239.21 | 0.4624 | HOMO→LUMO+5   | 0.313   |
| o-NO <sub>2</sub> -Na <sup>+</sup> @BPA | 354.59 | 0.1272 | HOMO→LUMO+1   | 0.68425 |
|                                         |        |        | HOMO-1→LUMO+1 |         |
|                                         | 305.83 | 0.0954 |               | 0.56409 |
|                                         |        |        | HOMO→LUMO+3   | 0.43991 |
|                                         | 243.12 | 0.537  | HOMO→LUMO+4   | 0.33026 |
| p-NO <sub>2</sub> -Na <sup>+</sup> @BPA | 350.31 | 0.1243 | HOMO→LUMO+1   | 0.69632 |
|                                         | 242.79 | 0.577  | HOMO→LUMO+2   | 0.61573 |

|                           |                  |        |               |                      |
|---------------------------|------------------|--------|---------------|----------------------|
|                           |                  |        | HOMO→LUMO+3   | 0.41762              |
|                           | 237.56           | 0.4446 | HOMO-5→LUMO+1 | 0.40079              |
| K+@BPA                    | 358.34           | 0.1468 | HOMO→LUMO     | 0.695                |
|                           | 252.35           | 0.4234 | HOMO→LUMO+3   | 0.47908              |
|                           | 232.2            | 0.5642 | HOMO→LUMO+1   | 0.37179              |
| m-CH <sub>3</sub> -K+@BPA | 356.33           | 0.1464 | HOMO→LUMO     | 0.69492              |
|                           | 251.59           | 0.4318 | HOMO→LUMO+2   | 0.52307              |
|                           |                  |        | HOMO→LUMO+4   | 0.32451              |
|                           | 232.59           | 0.7459 | HOMO→LUMO+5   | 0.32038              |
| o-CH <sub>3</sub> -K+@BPA | 355.76           | 0.1371 | HOMO→LUMO     | 0.69553              |
|                           | 251.11           | 0.3843 | HOMO→LUMO+1   | 0.43527              |
|                           | 233.16           | 0.8888 | HOMO→LUMO+4   | 0.46985              |
| p-CH <sub>3</sub> -K+@BPA | 356.97           | 0.1502 | HOMO→LUMO     | 0.69472              |
|                           | 251.36           | 0.4232 | HOMO→LUMO+2   | 0.51851              |
|                           |                  |        | HOMO→LUMO+5   | 0.36163              |
|                           | 232.37           | 0.7829 | HOMO→LUMO+4   | 0.32424              |
| m-NO <sub>2</sub> -K+@BPA | 358.32           | 0.1556 | HOMO→LUMO+1   | 0.58872              |
|                           | 305.99           | 0.0814 | HOMO-1→LUMO+1 | 0.45259              |
|                           | 246.05           | 0.3285 | HOMO→LUMO+4   | 0.52107              |
| o-NO <sub>2</sub> -K+@BPA | 355.66           | 0.132  | HOMO→LUMO+1   | 0.69383              |
|                           | 307.06           | 0.0677 | HOMO-1→LUMO+1 | 0.56276              |
|                           | 259.73           | 0.1649 | HOMO→LUMO+2   | 0.54042              |
| p-NO <sub>2</sub> -K+@BPA | 358.69           | 0.1814 | HOMO→LUMO     | 0.57214              |
|                           | 304.13           | 0.1135 | HOMO→LUMO+1   | 0.52001              |
|                           |                  |        | HOMO→LUMO+4   | 0.34887              |
|                           | 247.45           | 0.4094 | HOMO→LUMO+3   | 0.33443              |
| <b>In CCl<sub>4</sub></b> |                  |        |               |                      |
| Complex                   | $\lambda_{\max}$ | $f$    | FMO           | orbital contribution |
| BPA                       | 367.61           | 0.2596 | HOMO→LUMO     | 0.6956               |
|                           | 256.97           | 0.8017 | HOMO→LUMO+1   | 0.5645               |
|                           | 242.41           | 0.9102 | HOMO→LUMO+2   | 0.61146              |
|                           | 235.62           | 0.3292 | HOMO→LUMO+3   | 0.57981              |
| m-CH <sub>3</sub> -@BPA   | 367.21           | 0.2589 | HOMO→LUMO     | 0.69557              |
|                           | 256.45           | 0.7431 | HOMO→LUMO+1   | 0.52415              |
|                           | 242.26           | 0.8812 | HOMO→LUMO+2   | 0.61051              |
| o-CH <sub>3</sub> -@BPA   | 362.62           | 0.2344 | HOMO→LUMO     | 0.61051              |
|                           | 252.61           | 1.098  | HOMO→LUMO+1   | 0.49752              |
|                           | 240.48           | 0.6433 | HOMO→LUMO+2   | 0.57564              |



|                            |        |        |                            |                    |
|----------------------------|--------|--------|----------------------------|--------------------|
| p-CH <sub>3</sub> -@BPA    | 369.11 | 0.2716 | HOMO→LUMO                  | 0.69408            |
|                            | 257.38 | 0.8152 | HOMO→LUMO+1                | 0.54316            |
|                            | 257.38 | 0.8287 | HOMO→LUMO+2                | 0.5993             |
|                            | 236.42 | 0.3693 | HOMO→LUMO+3                | 0.50607            |
| m-NO <sub>2</sub> -@BPA    | 365.88 | 0.2579 | HOMO→LUMO                  | 0.50265            |
|                            | 260.91 | 0.0984 | HOMO-5→LUMO                | 0.31155            |
|                            | 256.22 | 0.6167 | HOMO→LUMO+2                | 0.5368             |
| o-NO <sub>2</sub> -@BPA    | 365.05 | 0.181  | HOMO→LUMO                  | 0.55301            |
|                            | 308.74 | 0.0985 | HOMO-2→LUMO+1              | 0.47417            |
|                            | 264.51 | 0.0669 | HOMO-6→LUMO                | 0.39538            |
|                            | 256.7  | 0.0697 | HOMO-2→LUMO                | 0.55315            |
| p-NO <sub>2</sub> -@BPA    | 368.89 | 0.3377 | HOMO→LUMO                  | 0.5541             |
|                            | 316.43 | 0.0884 | HOMO-8→LUMO                | 0.41136            |
|                            | 265.82 | 0.2863 | HOMO-1→LUMO+1              | 0.4739             |
|                            | 251.32 | 0.1219 | HOMO-2→LUMO                | 0.46155            |
| Li+@BPA                    | 360.44 | 0.1707 | HOMO→LUMO                  | 0.69765            |
|                            | 249.05 | 1.0068 | HOMO→LUMO+1                | 0.54253            |
|                            | 239.1  | 0.5353 | HOMO→LUMO+3                | 0.44048            |
| m-CH <sub>3</sub> -Li+@BPA | 361.02 | 0.1713 | HOMO→LUMO                  | 0.69837            |
|                            | 310.87 | 0.155  | HOMO-1→LUMO                | 0.59708            |
|                            | 245.79 | 1.3961 | HOMO-1→LUMO+1              | 0.53728            |
| o-CH <sub>3</sub> -Li+@BPA | 357.42 | 0.1632 | HOMO→LUMO                  | 0.69834            |
|                            | 308.1  | 0.155  | HOMO-1→LUMO                | 0.60724            |
|                            | 243.35 | 1.5995 | HOMO→LUMO+1                | 0.52961            |
| p-CH <sub>3</sub> -Li+@BPA | 358.02 | 0.1707 | HOMO→LUMO                  | 0.69804            |
|                            | 308.1  | 0.1517 | HOMO-1→LUMO                | 0.60194            |
|                            | 245.28 | 1.4401 | HOMO→LUMO+1                | 0.53569            |
| m-NO <sub>2</sub> -Li+@BPA | 360.01 | 0.183  | HOMO→LUMO+1                | 0.63136            |
|                            | 304.81 | 0.1238 | HOMO→LUMO                  | 0.45391            |
|                            | 258.57 | 0.2932 | HOMO→LUMO+2                | 0.53349            |
|                            | 246.13 | 0.2411 | HOMO-6→LUMO                | 0.46726            |
| o-NO <sub>2</sub> -Li+@BPA | 358.39 | 0.166  | HOMO→LUMO+1                | 0.68132            |
|                            | 308.35 | 0.1693 | HOMO-1→LUMO+1              | 0.60009            |
|                            | 253.16 | 0.0502 | HOMO-7→LUMO+1              | 0.54885            |
| p-NO <sub>2</sub> -Li+@BPA | 359.34 | 0.1988 | HOMO→LUMO                  | 0.55986            |
|                            | 246.43 | 0.8936 | HOMO→LUMO+3                | 0.37105            |
|                            | 240.77 | 0.9354 | HOMO→LUMO+3<br>HOMO-3→LUMO | 0.39069<br>0.31594 |
| Na+@BPA                    | 353.44 | 0.1643 | HOMO→LUMO                  | 0.69791            |
|                            | 244.6  | 1.7118 | HOMO→LUMO+1                | 0.57075            |
| m-CH <sub>3</sub> -Na+@BPA | 353.58 | 0.1667 | HOMO→LUMO                  | 0.69788            |

|                            |        |        |               |         |
|----------------------------|--------|--------|---------------|---------|
|                            | 307.31 | 0.1342 | HOMO-1→LUMO   | 0.59626 |
|                            | 244.76 | 1.6971 | HOMO→LUMO+1   | 0.55888 |
| o-CH <sub>3</sub> -Na+@BPA | 354.08 | 0.1646 | HOMO→LUMO     | 0.69795 |
|                            | 307.36 | 0.1355 | HOMO-1→LUMO   | 0.60017 |
|                            | 244.8  | 1.6545 | HOMO-8→LUMO   | 0.53746 |
| p-CH <sub>3</sub> -Na+@BPA | 353.53 | 0.1687 | HOMO→LUMO     | 0.69792 |
|                            | 307.32 | 0.1351 | HOMO-1→LUMO   | 0.59903 |
|                            | 244.77 | 1.7152 | HOMO→LUMO+2   | 0.56712 |
| m-NO <sub>2</sub> -Na+@BPA | 358.36 | 0.1924 | HOMO→LUMO+1   | 0.66148 |
|                            | 306.06 | 0.1565 | HOMO-1→LUMO+1 | 0.50394 |
|                            | 255.05 | 0.3173 | HOMO→LUMO+2   | 0.51384 |
|                            | 245.48 | 0.4418 | HOMO-6→LUMO   | 0.43923 |
| o-NO <sub>2</sub> -Na+@BPA | 358.02 | 0.1797 | HOMO→LUMO+1   | 0.68827 |
|                            | 307.64 | 0.157  | HOMO-1→LUMO+1 | 0.58462 |
|                            | 247.22 | 1.2943 | HOMO→LUMO+2   | 0.53983 |
| p-NO <sub>2</sub> -Na+@BPA | 353.71 | 0.1738 | HOMO→LUMO+1   | 0.69759 |
|                            | 248.7  | 1.2099 | HOMO-5→LUMO   | 0.36968 |
|                            | 241.89 | 0.4825 | HOMO-5→LUMO   | 0.4562  |
| K+@BPA                     | 360.42 | 0.2025 | HOMO→LUMO     | 0.69644 |
|                            | 253.07 | 1.0799 | HOMO→LUMO+1   | 0.58499 |
|                            | 238.38 | 0.4779 | HOMO→LUMO+4   | 0.58984 |
| m-CH <sub>3</sub> -K+@BPA  | 360.64 | 0.2054 | HOMO→LUMO     | 0.6962  |
|                            | 253.51 | 1.0565 | HOMO→LUMO+2   | 0.55718 |
|                            | 237.36 | 0.5548 | HOMO→LUMO+4   | 0.31416 |
| o-CH <sub>3</sub> -K+@BPA  | 359.85 | 0.1921 | HOMO→LUMO     | 0.69679 |
|                            | 252.45 | 1.0686 | HOMO→LUMO+1   | 0.56573 |
|                            |        |        | HOMO→LUMO+5   | 0.26604 |
|                            | 237.93 | 0.4635 | HOMO→LUMO+3   | 0.26228 |
| p-CH <sub>3</sub> -K+@BPA  | 361.33 | 0.2104 | HOMO→LUMO     | 0.69589 |
|                            | 253.32 | 1.0992 | HOMO→LUMO+2   | 0.42291 |
|                            | 237.07 | 0.4747 | HOMO→LUMO+4   | 0.4152  |
| m-NO <sub>2</sub> -K+@BPA  | 362.27 | 0.2202 | HOMO→LUMO+1   | 0.64731 |
|                            | 307.75 | 0.1274 | HOMO-1→LUMO+1 | 0.48668 |
|                            | 258.5  | 0.3796 | HOMO→LUMO+2   | 0.54464 |
|                            | 249.84 | 0.322  | HOMO-8→LUMO   | 0.34802 |
| o-NO <sub>2</sub> -K+@BPA  | 359.45 | 0.187  | HOMO→LUMO+1   | 0.69304 |
|                            | 308.23 | 0.1179 | HOMO-1→LUMO+1 | 0.57191 |
|                            | 260.11 | 0.1207 | HOMO-2→LUMO   | 0.45684 |
|                            | 255.77 | 0.4918 | HOMO→LUMO+2   | 0.50387 |

|                            |                  |        |                          |                      |
|----------------------------|------------------|--------|--------------------------|----------------------|
| p-NO <sub>2</sub> -K+@BPA  | 363.54           | 0.2696 | HOMO→LUMO+1              | 0.50918              |
|                            |                  |        | HOMO-1→LUMO+1            | 0.27034              |
|                            | 252.69           | 0.5455 | HOMO→LUMO+3              | 0.26075              |
|                            |                  |        | HOMO→LUMO+3              | 0.36963              |
|                            | 248.72           | 0.9316 | HOMO-1→LUMO              | 0.34072              |
| <b>In Ethanol</b>          |                  |        |                          |                      |
| Complex                    | $\lambda_{\max}$ | $f$    | FMO                      | orbital contribution |
| BPA                        | 365.11           | 0.2429 | HOMO→LUMO                | 0.69564              |
|                            | 256.86           | 0.6481 | HOMO→LUMO+1              | 0.57645              |
|                            | 241.04           | 1.0364 | HOMO→LUMO+2              | 0.60204              |
|                            | 236.08           | 0.2607 | HOMO→LUMO+3              | 0.58861              |
| m-CH <sub>3</sub> -@BPA    | 364.81           | 0.2424 | HOMO→LUMO                | 0.69563              |
|                            | 256.62           | 0.6081 | HOMO→LUMO+1              | 0.56634              |
|                            | 240.94           | 0.9892 | HOMO→LUMO+2              | 0.60346              |
|                            | 235.5            | 0.2457 | HOMO→LUMO+4              | 0.55868              |
| o-CH <sub>3</sub> -@BPA    | 360.26           | 0.2202 | HOMO→LUMO                | 0.69568              |
|                            | 252.02           | 0.8961 | HOMO→LUMO+1              | 0.4929               |
|                            | 240.13           | 0.7842 | HOMO-4→LUMO              | 0.46335              |
| p-CH <sub>3</sub> -@BPA    | 366.57           | 0.2543 | HOMO→LUMO                | 0.69432              |
|                            | 257.07           | 0.6877 | HOMO→LUMO+1              | 0.5646               |
|                            | 241.31           | 0.9509 | HOMO→LUMO+2              | 0.60301              |
|                            | 236.52           | 0.3405 | HOMO→LUMO+3              | 0.53788              |
| m-NO <sub>2</sub> -@BPA    | 363.1            | 0.2466 | HOMO→LUMO+1              | 0.65313              |
|                            | 307.87           | 0.0699 | HOMO-2→LUMO+1            | 0.54927              |
|                            | 267.96           | 0.1181 | HOMO-6→LUMO              | 0.42731              |
| o-NO <sub>2</sub> -@BPA    | 373.72           | 0.0798 | HOMO→LUMO                | 0.62021              |
|                            | 354.59           | 0.1462 | HOMO→LUMO+1              | 0.66861              |
|                            | 307.72           | 0.0848 | HOMO-2→LUMO+1            | 0.53339              |
|                            |                  |        | HOMO-5→LUMO              | 0.34642              |
|                            | 270.92           | 0.0715 | HOMO-6→LUMO              | 0.34309              |
| p-NO <sub>2</sub> -@BPA    | 368.41           | 0.3609 | HOMO→LUMO<br>HOMO→LUMO+1 | 0.49453<br>0.48097   |
|                            | 269.72           | 0.2161 | HOMO-1→LUMO+1            | 0.50263              |
|                            | 250.83           | 0.9077 | HOMO→LUMO+1              | 0.48453              |
| Li+@BPA                    | 358.49           | 0.1656 | HOMO→LUMO                | 0.6974               |
|                            | 307.48           | 0.1239 | HOMO-1→LUMO              | 0.57243              |
|                            | 246.5            | 1.2308 | HOMO→LUMO+1              | 0.54721              |
| m-CH <sub>3</sub> -Li+@BPA | 359.14           | 0.1647 | HOMO→LUMO                | 0.69817              |

|                                         |        |        |               |         |
|-----------------------------------------|--------|--------|---------------|---------|
|                                         | 244.44 | 1.3918 | HOMO→LUMO+1   | 0.54768 |
| o-CH <sub>3</sub> -Li <sup>+</sup> @BPA | 355.21 | 0.1569 | HOMO→LUMO     | 0.69816 |
|                                         | 242.14 | 1.5511 | HOMO→LUMO+1   | 0.56317 |
| p-CH <sub>3</sub> -Li <sup>+</sup> @BPA | 356.03 | 0.1647 | HOMO→LUMO     | 0.69782 |
|                                         | 243.71 | 1.4678 | HOMO→LUMO+1   | 0.56106 |
| m-NO <sub>2</sub> -Li <sup>+</sup> @BPA | 357.95 | 0.1782 | HOMO→LUMO+1   | 0.68179 |
|                                         | 306.44 | 0.1479 | HOMO-1→LUMO+1 | 0.5465  |
|                                         | 254.73 | 0.1978 | HOMO-5→LUMO   | 0.55726 |
|                                         | 253.34 | 0.4031 | HOMO→LUMO+2   | 0.58453 |
| o-NO <sub>2</sub> -Li <sup>+</sup> @BPA | 356.67 | 0.1601 | HOMO→LUMO+1   | 0.68115 |
|                                         | 325.71 | 0.026  | HOMO-6→LUMO   | 0.5118  |
|                                         | 307.74 | 0.1477 | HOMO-1→LUMO+1 | 0.59233 |
| p-NO <sub>2</sub> -Li <sup>+</sup> @BPA | 357.38 | 0.2042 | HOMO→LUMO+1   | 0.59244 |
|                                         | 254.14 | 0.3451 | HOMO-6→LUMO   | 0.46688 |
|                                         |        |        | HOMO→LUMO+3   | 0.38695 |
|                                         | 241.7  | 1.4141 | HOMO→LUMO+4   | 0.38249 |
| Na <sup>+</sup> @BPA                    | 351.96 | 0.1566 | HOMO→LUMO     | 0.69786 |
|                                         | 242.99 | 1.7505 | HOMO→LUMO+1   | 0.57598 |
| m-CH <sub>3</sub> -Na <sup>+</sup> @BPA | 325.1  | 0.1591 | HOMO→LUMO     | 0.69779 |
|                                         | 243.3  | 1.6823 | HOMO→LUMO+1   | 0.5678  |
| o-CH <sub>3</sub> -Na <sup>+</sup> @BPA | 352.49 | 0.1573 | HOMO→LUMO     | 0.69786 |
|                                         | 243.3  | 1.594  | HOMO→LUMO+1   | 0.55176 |
| p-CH <sub>3</sub> -Na <sup>+</sup> @BPA | 352.04 | 0.1617 | HOMO→LUMO     | 0.69785 |
|                                         | 243.17 | 1.7505 | HOMO→LUMO+1   | 0.57507 |
| m-NO <sub>2</sub> -Na <sup>+</sup> @BPA | 356.66 | 0.1861 | HOMO→LUMO+1   | 0.68149 |
|                                         | 306.38 | 0.1254 | HOMO-1→LUMO+1 | 0.54041 |
|                                         | 254.57 | 0.2185 | HOMO-5→LUMO   | 0.51059 |
|                                         | 250.95 | 0.5368 | HOMO-1→LUMO+2 | 0.56531 |
| o-NO <sub>2</sub> -Na <sup>+</sup> @BPA | 356.69 | 0.1728 | HOMO→LUMO+1   | 0.68742 |
|                                         | 307.22 | 0.1344 | HOMO-2→LUMO+1 | 0.56547 |
|                                         | 246.41 | 0.4214 | HOMO-3→LUMO   | 0.38269 |
| p-NO <sub>2</sub> -Na <sup>+</sup> @BPA | 351.87 | 0.1695 | HOMO→LUMO+1   | 0.69747 |
|                                         | 255.71 | 0.5299 | HOMO-5→LUMO   | 0.56733 |
|                                         | 242.18 | 1.4399 | HOMO→LUMO+1   | 0.5102  |
| K <sup>+</sup> @BPA                     | 359.65 | 0.1944 | HOMO→LUMO     | 0.69628 |
|                                         | 250.61 | 1.1906 | HOMO→LUMO+1   | 0.55536 |
|                                         | 236.02 | 0.4145 | HOMO→LUMO+3   | 0.42162 |
| m-CH <sub>3</sub> -K <sup>+</sup> @BPA  | 359.92 | 0.1969 | HOMO→LUMO     | 0.69594 |
|                                         | 251.07 | 1.1595 | HOMO→LUMO+1   | 0.55494 |
|                                         | 236.09 | 0.5207 | HOMO→LUMO+3   | 0.4635  |

|                           |                  |        |               |                      |
|---------------------------|------------------|--------|---------------|----------------------|
| o-CH <sub>3</sub> -K+@BPA | 358.94           | 0.1838 | HOMO→LUMO     | 0.69663              |
|                           | 249.76           | 1.2332 | HOMO→LUMO+1   | 0.55605              |
|                           | 236.06           | 0.3804 | HOMO→LUMO+3   | 0.39968              |
| p-CH <sub>3</sub> -K+@BPA | 360.67           | 0.2025 | HOMO→LUMO     | 0.69549              |
|                           | 250.99           | 1.2022 | HOMO→LUMO+1   | 0.54692              |
|                           | 236.17           | 0.4781 | HOMO→LUMO+3   | 0.4628               |
| m-NO <sub>2</sub> -K+@BPA | 360.79           | 0.2123 | HOMO→LUMO+1   | 0.6679               |
|                           |                  |        | HOMO-2→LUMO+1 | 0.40263              |
|                           | 307.5            | 0.1005 | HOMO-1→LUMO+1 | 0.40139              |
|                           | 257.9            | 0.1641 | HOMO-6→LUMO   | 0.42633              |
|                           |                  |        | HOMO→LUMO+2   | 0.5542               |
|                           | 255.21           | 0.4724 |               |                      |
| o-NO <sub>2</sub> -K+@BPA | 359.04           | 0.1378 | HOMO→LUMO+1   | 0.62283              |
|                           | 307.63           | 0.0988 | HOMO-1→LUMO+1 | 0.51726              |
|                           | 252.27           | 0.3232 | HOMO→LUMO+2   | 0.41065              |
| p-NO <sub>2</sub> -K+@BPA | 362.92           | 0.2788 | HOMO→LUMO+1   | 0.55117              |
|                           | 259.64           | 0.2944 | HOMO-8→LUMO   | 0.32762              |
|                           | 247.9            | 1.1584 | HOMO→LUMO+2   | 0.41611              |
| <b>In Methanol</b>        |                  |        |               |                      |
| Complex                   | $\lambda_{\max}$ | $f$    | FMO           | orbital contribution |
| BPA                       | 364.74           | 0.2382 | HOMO→LUMO     | 0.69561              |
|                           | 256.69           | 0.6164 | HOMO→LUMO+1   | 0.57726              |
|                           | 240.63           | 1.0478 | HOMO→LUMO+2   | 0.60012              |
|                           | 236.04           | 0.2546 | HOMO→LUMO+3   | 0.5896               |
| m-CH <sub>3</sub> -@BPA   | 364.45           | 0.2377 | HOMO→LUMO     | 0.6956               |
|                           | 256.44           | 0.5776 | HOMO→LUMO+1   | 0.56669              |
|                           | 240.55           | 1.001  | HOMO→LUMO+3   | 0.60152              |
|                           | 235.47           | 0.2397 | HOMO→LUMO+4   | 0.55918              |
| o-CH <sub>3</sub> -@BPA   | 359.61           | 0.216  | HOMO→LUMO     | 0.69565              |
|                           | 251.78           | 0.8513 | HOMO→LUMO+1   | 0.48901              |
|                           | 239.83           | 0.8056 | HOMO→LUMO+2   | 0.55793              |
| p-CH <sub>3</sub> -@BPA   | 366.2            | 0.2495 | HOMO→LUMO     | 0.6943               |
|                           | 256.88           | 0.6554 | HOMO→LUMO+1   | 0.56467              |
|                           | 240.92           | 0.9662 | HOMO→LUMO+3   | 0.60127              |
|                           | 236.42           | 0.3336 | HOMO→LUMO+4   | 0.53882              |
| m-NO <sub>2</sub> -@BPA   | 362.74           | 0.242  | HOMO→LUMO+1   | 0.65337              |
|                           | 307.75           | 0.0674 | HOMO-2→LUMO+1 | 0.55061              |
|                           | 268.06           | 0.116  | HOMO-6→LUMO   | 0.42655              |

|                            |        |        |               |         |
|----------------------------|--------|--------|---------------|---------|
| o-NO <sub>2</sub> -@BPA    | 374.11 | 0.0752 | HOMO→LUMO     | 0.62224 |
|                            | 354.43 | 0.1465 | HOMO→LUMO+1   | 0.67095 |
|                            | 307.62 | 0.0819 | HOMO-2→LUMO+1 | 0.53323 |
|                            | 271.04 | 0.0682 | HOMO-5→LUMO   | 0.3452  |
| p-NO <sub>2</sub> -@BPA    | 368.1  | 0.3557 | HOMO→LUMO     | 0.49433 |
|                            | 269.65 | 0.2107 | HOMO-1→LUMO+1 | 0.50414 |
|                            | 250.6  | 0.8322 | HOMO→LUMO+2   | 0.47105 |
| Li+@BPA                    | 358.19 | 0.1627 | HOMO-2→LUMO+5 | 0.25195 |
|                            | 307.37 | 0.1184 | HOMO-1→LUMO   | 0.56953 |
| m-CH <sub>3</sub> -Li+@BPA | 358.84 | 0.1618 | HOMO→LUMO     | 0.69811 |
|                            | 244.05 | 1.3125 | HOMO-1→LUMO   | 0.56138 |
| o-CH <sub>3</sub> -Li+@BPA | 354.91 | 0.1541 | HOMO→LUMO     | 0.6981  |
|                            | 307.28 | 0.1271 | HOMO-1→LUMO   | 0.58911 |
|                            | 241.71 | 1.5302 | HOMO→LUMO+1   | 0.56265 |
| p-CH <sub>3</sub> -Li+@BPA | 355.74 | 0.1619 | HOMO→LUMO     | 0.69776 |
|                            | 307.23 | 0.1228 | HOMO-1→LUMO   | 0.5688  |
|                            | 243.26 | 1.4949 | HOMO-2→LUMO   | 0.4239  |
| m-NO <sub>2</sub> -Li+@BPA | 357.66 | 0.1751 | HOMO→LUMO+1   | 0.68194 |
|                            | 306.33 | 0.1425 | HOMO-1→LUMO   | 0.54586 |
|                            | 254.93 | 0.1874 | HOMO-5→LUMO   | 0.55932 |
|                            | 253.05 | 0.3756 | HOMO→LUMO+2   | 0.57232 |
| o-NO <sub>2</sub> -Li+@BPA | 356.39 | 0.1572 | HOMO→LUMO+1   | 0.68111 |
|                            | 325.64 | 0.0257 | HOMO-6→LUMO   | 0.51009 |
|                            |        |        | HOMO-1→LUMO+2 |         |
|                            | 307.62 | 0.1427 |               | 0.59081 |
| p-NO <sub>2</sub> -Li+@BPA | 357.07 | 0.2011 | HOMO→LUMO+1   | 0.59389 |
|                            | 254.32 | 0.3349 | HOMO-6→LUMO   | 0.46872 |
|                            |        |        | HOMO→LUMO+2   | 0.39886 |
|                            | 241.29 | 1.3829 | HOMO→LUMO+3   | 0.36567 |
| Na+@BPA                    | 351.68 | 0.1538 | HOMO→LUMO     | 0.6978  |
|                            | 242.48 | 1.7356 | HOMO→LUMO+1   | 0.57524 |
| m-CH <sub>3</sub> -Na+@BPA | 351.83 | 0.1563 | HOMO→LUMO     | 0.69773 |
|                            | 242.82 | 1.6482 | HOMO→LUMO+1   | 0.56438 |
| o-CH <sub>3</sub> -Na+@BPA | 352.22 | 0.1545 | HOMO→LUMO     | 0.6978  |
|                            | 242.89 | 1.417  | HOMO→LUMO+1   | 0.52146 |
| p-CH <sub>3</sub> -Na+@BPA | 351.76 | 0.1588 | HOMO→LUMO     | 0.69779 |
|                            | 242.67 | 1.7356 | HOMO→LUMO+1   | 0.57428 |
| m-NO <sub>2</sub> -Na+@BPA | 356.37 | 0.1828 | HOMO→LUMO+1   | 0.68171 |
|                            | 306.28 | 0.1203 | HOMO-1→LUMO+1 | 0.53802 |

|                            |                  |        |               |                      |
|----------------------------|------------------|--------|---------------|----------------------|
|                            | 254.78           | 0.2087 | HOMO-6→LUMO   | 0.50921              |
|                            | 250.63           | 0.5261 | HOMO→LUMO+2   | 0.56921              |
| o-NO <sub>2</sub> -Na+@BPA | 356.43           | 0.1696 | HOMO→LUMO+1   | 0.68732              |
|                            | 307.11           | 0.1297 | HOMO-1→LUMO+1 | 0.56294              |
|                            | 246.35           | 0.252  | HOMO-2→LUMO   | 0.39797              |
| p-NO <sub>2</sub> -Na+@BPA | 351.58           | 0.1666 | HOMO→LUMO+1   | 0.69741              |
|                            | 255.82           | 0.5086 | HOMO-5→LUMO   | 0.5676               |
|                            | 241.72           | 1.4391 | HOMO→LUMO+2   | 0.51515              |
| K+@BPA                     | 359.38           | 0.1908 | HOMO→LUMO     | 0.69622              |
|                            | 250.22           | 1.1579 | HOMO→LUMO+1   | 0.55107              |
|                            | 235.85           | 0.5071 | HOMO→LUMO+3   | 0.48373              |
| m-CH <sub>3</sub> -K+@BPA  | 359.66           | 0.1934 | HOMO→LUMO     | 0.69588              |
|                            | 250.69           | 1.1262 | HOMO→LUMO+1   | 0.55071              |
|                            | 235.84           | 0.5287 | HOMO→LUMO+3   | 0.46215              |
| o-CH <sub>3</sub> -K+@BPA  | 358.68           | 0.1804 | HOMO→LUMO     | 0.69657              |
|                            | 249.37           | 1.2    | HOMO→LUMO+1   | 0.55157              |
|                            | 235.89           | 0.3465 | HOMO→LUMO+3   | 0.37469              |
| p-CH <sub>3</sub> -K+@BPA  | 360.41           | 0.1988 | HOMO→LUMO     | 0.69543              |
|                            | 250.62           | 1.1697 | HOMO→LUMO+1   | 0.5425               |
|                            | 235.98           | 0.4625 | HOMO→LUMO+3   | 0.45826              |
| m-NO <sub>2</sub> -K+@BPA  | 360.5            | 0.2085 | HOMO→LUMO+1   | 0.66813              |
|                            | 307.41           | 0.0964 | HOMO-2→LUMO+1 | 0.40649              |
|                            | 258.09           | 0.1554 | HOMO-6→LUMO+1 | 0.42566              |
|                            | 254.97           | 0.4614 | HOMO→LUMO+2   | 0.5576               |
| o-NO <sub>2</sub> -K+@BPA  | 358.9            | 0.1271 | HOMO→LUMO+1   | 0.6066               |
|                            | 354.93           | 0.0615 | HOMO→LUMO     | 0.56894              |
|                            | 307.54           | 0.0951 | HOMO-1→LUMO+1 | 0.51168              |
|                            | 252.25           | 0.236  | HOMO→LUMO+2   | 0.37793              |
| p-NO <sub>2</sub> -K+@BPA  | 362.63           | 0.2745 | HOMO→LUMO+1   | 0.55165              |
|                            | 259.73           | 0.288  | HOMO-7→LUMO   | 0.32771              |
|                            | 247.55           | 1.1172 | HOMO→LUMO+2   | 0.41922              |
| <b>In DMSO</b>             |                  |        |               |                      |
| Complex                    | $\lambda_{\max}$ | $f$    | FMO           | orbital contribution |
| BPA                        | 365.51           | 0.2502 | HOMO→LUMO     | 0.6957               |
|                            | 257.25           | 0.6945 | HOMO→LUMO+1   | 0.5752               |
|                            | 241.64           | 1.0243 | HOMO→LUMO+2   | 0.6024               |
|                            | 236.25           | 0.2591 | HOMO→LUMO+3   | 0.58528              |
|                            |                  |        |               | 0.69569              |
| m-CH <sub>3</sub> -@BPA    | 365.21           | 0.2496 | HOMO→LUMO     |                      |
|                            | 256.97           | 0.669  | HOMO→LUMO+1   | 0.57089              |
|                            | 241.53           | 0.975  | HOMO→LUMO+2   | 0.60466              |
|                            | 235.68           | 0.2519 | HOMO→LUMO+3   | 0.55879              |

|                            |        |        |                          |         |
|----------------------------|--------|--------|--------------------------|---------|
| o-CH <sub>3</sub> -@BPA    | 360.6  | 0.2268 | HOMO→LUMO                | 0.69577 |
|                            | 252.5  | 0.9457 | HOMO→LUMO+1              | 0.50036 |
|                            | 240.62 | 0.7613 | HOMO→LUMO+2              | 0.57211 |
| p-CH <sub>3</sub> -@BPA    | 366.96 | 0.2617 | HOMO→LUMO                | 0.69438 |
|                            | 257.46 | 0.7321 | HOMO→LUMO+1              | 0.56704 |
|                            | 241.89 | 0.9301 | HOMO→LUMO+2              | 0.60536 |
|                            | 236.7  | 0.3458 | HOMO→LUMO+3              | 0.53626 |
| m-NO <sub>2</sub> -@BPA    | 363.48 | 0.2542 | HOMO→LUMO+1              | 0.65435 |
|                            | 307.89 | 0.0741 | HOMO-2→LUMO+1            | 0.55512 |
|                            | 268.72 | 0.1257 | HOMO-6→LUMO              | 0.43246 |
| o-NO <sub>2</sub> -@BPA    | 374.86 | 0.0798 | HOMO→LUMO                | 0.62222 |
|                            | 355.03 | 0.1533 | HOMO→LUMO+1              | 0.67056 |
|                            | 307.78 | 0.0892 | HOMO-2→LUMO+1            | 0.53648 |
|                            | 271.5  | 0.0779 | HOMO-5→LUMO              | 0.34596 |
|                            |        |        |                          | 0.49391 |
| p-NO <sub>2</sub> -@BPA    | 369.03 | 0.3744 | HOMO→LUMO<br>HOMO→LUMO+1 | 0.48099 |
|                            | 270.04 | 0.2167 | HOMO-1→LUMO+1            | 0.50359 |
|                            | 251.4  | 0.982  | HOMO→LUMO+2              | 0.49829 |
| Li+@BPA                    | 358.84 | 0.1709 | HOMO→LUMO                | 0.69748 |
|                            | 247.01 | 1.3155 | HOMO→LUMO+1              | 0.55145 |
| m-CH <sub>3</sub> -Li+@BPA | 359.49 | 0.1697 | HOMO→LUMO                | 0.69826 |
|                            | 245.18 | 1.4395 | HOMO→LUMO+1              | 0.55268 |
| o-CH <sub>3</sub> -Li+@BPA | 355.51 | 0.1619 | HOMO→LUMO                | 0.69826 |
|                            | 307.51 | 0.1385 | HOMO-1→LUMO              | 0.59021 |
|                            | 242.93 | 1.5832 | HOMO→LUMO+1              | 0.56631 |
| p-CH <sub>3</sub> -Li+@BPA | 356.36 | 0.1698 | HOMO→LUMO                | 0.69791 |
|                            | 307.5  | 0.1339 | HOMO-1→LUMO              | 0.56702 |
|                            | 244.46 | 0.887  | HOMO→LUMO+1              | 0.43360 |
| m-NO <sub>2</sub> -Li+@BPA | 358.3  | 0.1839 | HOMO→LUMO+1              | 0.68226 |
|                            | 306.62 | 0.1549 | HOMO-1→LUMO+1            | 0.54718 |
|                            | 255.69 | 0.1983 | HOMO-5→LUMO              | 0.56399 |
|                            | 253.21 | 0.4269 | HOMO→LUMO+2              | 0.56399 |
| o-NO <sub>2</sub> -Li+@BPA | 357    | 0.1651 | HOMO→LUMO+1              | 0.68186 |
|                            | 325.79 | 0.0273 | HOMO-6→LUMO              | 0.50903 |
|                            | 307.91 | 0.1553 | HOMO-1→LUMO+1            | 0.59357 |
| p-NO <sub>2</sub> -Li+@BPA | 357.73 | 0.2115 | HOMO→LUMO+1              | 0.59496 |
|                            | 255.02 | 0.3468 | HOMO-6→LUMO              | 0.46921 |
|                            | 242.48 | 1.48   | HOMO→LUMO+2              | 0.42130 |
| Na+@BPA                    | 352.3  | 0.1615 | HOMO→LUMO                | 0.69798 |
|                            | 243.82 | 1.7831 | HOMO→LUMO+1              | 0.57755 |
| m-CH <sub>3</sub> -Na+@BPA | 352.46 | 0.1641 | HOMO→LUMO                | 0.69789 |



|                            |                  |        |               |                      |
|----------------------------|------------------|--------|---------------|----------------------|
|                            | 244.11           | 1.7181 | HOMO→LUMO+1   | 0.57028              |
| o-CH <sub>3</sub> -Na+@BPA | 352.83           | 0.1626 | HOMO→LUMO     | 0.69796              |
|                            | 244.09           | 1.6455 | HOMO→LUMO+1   | 0.5572               |
| p-CH <sub>3</sub> -Na+@BPA | 352.39           | 0.166  | HOMO→LUMO     | 0.69798              |
|                            | 244              | 1.7827 | HOMO→LUMO+1   | 0.57676              |
| m-NO <sub>2</sub> -Na+@BPA | 357.04           | 0.192  | HOMO→LUMO+1   | 0.68213              |
|                            | 306.52           | 0.1294 | HOMO-1→LUMO+1 | 0.53532              |
|                            | 255.62           | 0.2197 | HOMO-6→LUMO   | 0.50596              |
|                            | 250.93           | 0.6289 | HOMO→LUMO+2   | 0.50596              |
| o-NO <sub>2</sub> -Na+@BPA | 357.08           | 0.1782 | HOMO→LUMO+1   | 0.68733              |
|                            | 307.38           | 0.1412 | HOMO-1→LUMO+1 | 0.56452              |
|                            |                  |        | HOMO→LUMO+2   | 0.37547              |
|                            | 246.74           | 1.4959 | HOMO-2→LUMO   | 0.33186              |
| p-NO <sub>2</sub> -Na+@BPA | 352.2            | 0.175  | HOMO→LUMO+1   | 0.69757              |
|                            | 256.61           | 0.524  | HOMO-5→LUMO   | 0.55873              |
|                            | 242.9            | 1.4959 | HOMO→LUMO+2   | 0.50989              |
| K+@BPA                     | 360.09           | 0.2005 | HOMO→LUMO     | 0.69637              |
|                            | 251.09           | 1.2691 | HOMO→LUMO+1   | 0.55817              |
|                            | 236.3            | 0.2843 | HOMO→LUMO+3   | 0.32873              |
| m-CH <sub>3</sub> -K+@BPA  | 360.37           | 0.2031 | HOMO→LUMO     | 0.69602              |
|                            | 251.53           | 1.238  | HOMO→LUMO+1   | 0.55797              |
|                            | 236.39           | 0.4736 | HOMO→LUMO+2   | 0.55797              |
| o-CH <sub>3</sub> -K+@BPA  | 359.37           | 0.1896 | HOMO→LUMO     | 0.69672              |
|                            | 250.25           | 1.3163 | HOMO→LUMO+1   | 0.55681              |
|                            | 236.64           | 0.3563 | HOMO→LUMO+2   | 0.39469              |
| p-CH <sub>3</sub> -K+@BPA  | 361.33           | 0.2087 | HOMO→LUMO     | 0.69555              |
|                            | 251.48           | 1.2792 | HOMO→LUMO+1   | 0.54907              |
|                            | 236.5            | 0.4517 | HOMO→LUMO+2   | 0.45264              |
| m-NO <sub>2</sub> -K+@BPA  | 361.2            | 0.219  | HOMO→LUMO+1   | 0.66878              |
|                            | 307.62           | 0.1048 | HOMO-2→LUMO+1 | 0.41108              |
|                            | 258.83           | 0.1664 | HOMO-6→LUMO   | 0.42608              |
|                            | 255.27           | 0.5362 | HOMO→LUMO+2   | 0.54641              |
| o-NO <sub>2</sub> -K+@BPA  | 359.48           | 0.1416 | HOMO→LUMO+1   | 0.62073              |
|                            | 307.74           | 0.1041 | HOMO-1→LUMO+1 | 0.50955              |
|                            | 252.62           | 0.305  | HOMO→LUMO+2   | 0.38829              |
| p-NO <sub>2</sub> -K+@BPA  | 363.4            | 0.2886 | HOMO→LUMO+1   | 0.5518               |
|                            | 260.25           | 0.2977 | HOMO-7→LUMO   | 0.32978              |
|                            | 248.44           | 1.2384 | HOMO→LUMO+2   | 0.4321               |
| <b>In Water</b>            |                  |        |               |                      |
| Complex                    | $\lambda_{\max}$ | $f$    | FMO           | orbital contribution |
| BPA                        | 364.48           | 0.2389 | HOMO→LUMO     | 0.69561              |

|                                         |        |        |                          |                    |
|-----------------------------------------|--------|--------|--------------------------|--------------------|
|                                         | 256.77 | 0.6164 | HOMO→LUMO+1              | 0.57741            |
|                                         | 240.66 | 1.0512 | HOMO→LUMO+2              | 0.59905            |
|                                         | 236.12 | 0.2489 | HOMO→LUMO+3              | 0.58844            |
| m-CH <sub>3</sub> -@BPA                 | 364.39 | 0.2391 | HOMO→LUMO                | 0.69561            |
|                                         | 256.5  | 0.5868 | HOMO→LUMO+1              | 0.57020            |
|                                         | 240.58 | 1.004  | HOMO→LUMO+2              | 0.60095            |
|                                         | 235.55 | 0.2387 | HOMO→LUMO+3              | 0.55985            |
| o-CH <sub>3</sub> -@BPA                 | 359.83 | 0.1554 | HOMO→LUMO                | 0.69569            |
|                                         | 251.86 | 0.8432 | HOMO→LUMO+1              | 0.49086            |
|                                         | 239.99 | 0.8122 | HOMO→LUMO+2              | 0.55988            |
| p-CH <sub>3</sub> -@BPA                 | 366.12 | 0.2498 | HOMO→LUMO                | 0.69432            |
|                                         | 256.95 | 0.6566 | HOMO→LUMO+1              | 0.56637            |
|                                         | 240.94 | 0.9697 | HOMO→LUMO+2              | 0.60168            |
|                                         | 236.54 | 0.3312 | HOMO→LUMO+3              | 0.53856            |
| m-NO <sub>2</sub> -@BPA                 | 362.68 | 0.2426 | HOMO→LUMO+1              | 0.65396            |
|                                         | 307.71 | 0.0676 | HOMO-2→LUMO+1            | 0.55430            |
|                                         | 268.56 | 0.1185 | HOMO-6→LUMO              | 0.42884            |
| o-NO <sub>2</sub> -@BPA                 | 375.1  | 0.0717 | HOMO→LUMO                | 0.62484            |
|                                         | 354.54 | 0.1504 | HOMO→LUMO+1              | 0.67363            |
|                                         | 307.58 | 0.082  | HOMO-2→LUMO+1            | 0.53475            |
|                                         | 271.46 | 0.0688 | HOMO-5→LUMO              | 0.34320            |
| p-NO <sub>2</sub> -@BPA                 | 368.22 | 0.3592 | HOMO→LUMO<br>HOMO→LUMO+1 | 0.49404<br>0.48101 |
|                                         | 269.77 | 0.2069 | HOMO-1→LUMO+1            | 0.50581            |
|                                         | 250.74 | 0.8264 | HOMO→LUMO+2              | 0.47168            |
| Li <sup>+</sup> @BPA                    | 358.16 | 0.1634 | HOMO→LUMO                | 0.69733            |
|                                         | 246.04 | 1.2319 | HOMO→LUMO+1              | 0.54192            |
|                                         | 232.36 | 0.2012 | HOMO→LUMO+2              | 0.37856            |
| m-CH <sub>3</sub> -Li <sup>+</sup> @BPA | 358.8  | 0.1623 | HOMO-1→LUMO              | 0.55556            |
|                                         | 244.2  | 1.2467 | HOMO→LUMO+1              | 0.52297            |
| o-CH <sub>3</sub> -Li <sup>+</sup> @BPA | 354.84 | 0.1547 | HOMO→LUMO                | 0.69811            |
|                                         | 241.82 | 1.5267 | HOMO-1→LUMO              | 0.56296            |
| p-CH <sub>3</sub> -Li <sup>+</sup> @BPA | 355.69 | 0.1625 | HOMO→LUMO                | 0.69776            |
|                                         | 243.32 | 1.5046 | HOMO→LUMO+1              | 0.56796            |
| m-NO <sub>2</sub> -Li <sup>+</sup> @BPA | 357.62 | 0.1759 | HOMO→LUMO+1              | 0.68226            |
|                                         | 306.34 | 0.142  | HOMO-1→LUMO+1            | 0.54535            |
|                                         | 255.64 | 0.185  | HOMO-2→LUMO              | 0.41603            |
|                                         | 252.83 | 0.272  | HOMO→LUMO+2              | 0.48692            |
| o-NO <sub>2</sub> -Li <sup>+</sup> @BPA | 356.37 | 0.1579 | HOMO→LUMO+1              | 0.68152            |
|                                         | 325.63 | 0.0262 | HOMO→LUMO                | 0.65986            |
|                                         | 307.61 | 0.1428 | HOMO-1→LUMO+1            | 0.59023            |
| p-NO <sub>2</sub> -Li <sup>+</sup> @BPA | 357.03 | 0.2026 | HOMO→LUMO+1              | 0.59613            |
|                                         | 254.97 | 0.3284 | HOMO-7→LUMO+1            | 0.47085            |
|                                         | 241.39 | 1.4025 | HOMO→LUMO+2              | 0.43379            |
| Na <sup>+</sup> @BPA                    | 351.65 | 0.1543 | HOMO→LUMO                | 0.69783            |

|                                         |        |        |               |         |
|-----------------------------------------|--------|--------|---------------|---------|
|                                         | 242.55 | 1.7434 | HOMO→LUMO+1   | 0.57548 |
| m-CH <sub>3</sub> -Na <sup>+</sup> @BPA | 351.81 | 0.1569 | HOMO→LUMO     | 0.69774 |
|                                         | 242.92 | 1.6363 | HOMO→LUMO+1   | 0.56223 |
| o-CH <sub>3</sub> -Na <sup>+</sup> @BPA | 352.19 | 0.1554 | HOMO→LUMO     | 0.69781 |
|                                         | 243.07 | 1.1396 | HOMO→LUMO+1   | 0.46627 |
|                                         | 242.07 | 0.5551 | HOMO-2→LUMO   | 0.47398 |
| p-CH <sub>3</sub> -Na <sup>+</sup> @BPA | 351.73 | 0.1587 | HOMO→LUMO     | 0.69783 |
|                                         | 242.73 | 1.7422 | HOMO→LUMO+1   | 0.57452 |
| m-NO <sub>2</sub> -Na <sup>+</sup> @BPA | 356.36 | 0.1835 | HOMO→LUMO+1   | 0.68223 |
|                                         | 306.28 | 0.1183 | HOMO-1→LUMO+1 | 0.53254 |
|                                         | 255.55 | 0.2045 | HOMO-6→LUMO   | 0.50413 |
|                                         | 250.35 | 0.5639 | HOMO→LUMO+2   | 0.56601 |
| o-NO <sub>2</sub> -Na <sup>+</sup> @BPA | 356.45 | 0.1702 | HOMO→LUMO     | 0.68716 |
|                                         | 307.12 | 0.1297 | HOMO-1→LUMO+1 | 0.56000 |
|                                         | 246.44 | 0.2337 | HOMO-2→LUMO   | 0.38815 |
| p-NO <sub>2</sub> -Na <sup>+</sup> @BPA | 351.53 | 0.1674 | HOMO→LUMO+1   | 0.69742 |
|                                         | 256.41 | 0.4881 | HOMO-5→LUMO   | 0.56138 |
|                                         | 241.76 | 1.4704 | HOMO→LUMO+3   | 0.51843 |
| K <sup>+</sup> @BPA                     | 359.43 | 0.1915 | HOMO→LUMO     | 0.69622 |
|                                         | 250.18 | 1.1772 | HOMO→LUMO+1   | 0.54935 |
|                                         | 235.89 | 0.5164 | HOMO→LUMO+3   | 0.49235 |
| m-CH <sub>3</sub> -K <sup>+</sup> @BPA  | 359.71 | 0.194  | HOMO→LUMO     | 0.69587 |
|                                         | 250.65 | 1.1448 | HOMO→LUMO+1   | 0.54915 |
|                                         | 235.83 | 0.509  | HOMO→LUMO+3   | 0.44395 |
| o-CH <sub>3</sub> -K <sup>+</sup> @BPA  | 358.71 | 0.1811 | HOMO→LUMO     | 0.69658 |
|                                         | 249.32 | 1.2221 | HOMO→LUMO+1   | 0.54825 |
|                                         | 235.86 | 0.2977 | HOMO→LUMO+3   | 0.34149 |
| p-CH <sub>3</sub> -K <sup>+</sup> @BPA  | 360.46 | 0.1995 | HOMO→LUMO     | 0.69541 |
|                                         | 250.58 | 1.188  | HOMO→LUMO+1   | 0.54008 |
|                                         | 236.02 | 0.4668 | HOMO→LUMO+3   | 0.44420 |
| m-NO <sub>2</sub> -K <sup>+</sup> @BPA  | 360.5  | 0.2093 | HOMO→LUMO     | 0.66880 |
|                                         | 307.41 | 0.0956 | HOMO-2→LUMO+1 | 0.41409 |
|                                         | 258.76 | 0.1529 | HOMO-6→LUMO   | 0.42413 |
|                                         | 254.8  | 0.4529 | HOMO→LUMO+2   | 0.55582 |
| o-NO <sub>2</sub> -K <sup>+</sup> @BPA  | 359.05 | 0.1196 | HOMO→LUMO+1   | 0.58955 |
|                                         | 355.23 | 0.0695 | HOMO→LUMO     | 0.55307 |
|                                         | 307.53 | 0.0949 | HOMO-1→LUMO+1 | 0.50166 |
|                                         | 252.49 | 0.1677 | HOMO→LUMO+2   | 0.33470 |
| p-NO <sub>2</sub> -K <sup>+</sup> @BPA  | 362.68 | 0.2766 | HOMO→LUMO+1   | 0.55229 |
|                                         | 260.14 | 0.2851 | HOMO-7→LUMO   | 0.32895 |
|                                         | 247.56 | 1.1311 | HOMO→LUMO+2   | 0.43041 |
|                                         |        |        |               |         |
